# Supplementary material
Source: PubMed Central journal article supplement (PMC1914186)
Supplement: plntphys_pp.106.095018_5.pdf [file plntphys_pp.106.095018_5.pdf]

Supplemental Table 1. PCR primers used in this study

| Name           | Sequence                                         | Usage                                                                                                 |
|----------------|--------------------------------------------------|-------------------------------------------------------------------------------------------------------|
| MFNSII-1F      | AA <b>ggatc</b> AATCAACTAATA TACTA TAGC          | Clone MfNSII-1 and construct the pESC-His-MfNSII-1 yeast expression vector                            |
| MfNSII-1R      | AA <b>ctc</b> gag TCAGTA TCCAAGGCTTTG AAGAG      |                                                                                                       |
| MFNSII-2F      | AA <b>ggatc</b> ACCTCTTACACTAGCTTCAACATA C       | Clone MfNSII-2 and construct the pESC-His-MfNSII-2 yeast expression vector                            |
| MfNSII-2R      | AA <b>ctc</b> gag TCAACATCCAAGGCTTTG AAGAG       |                                                                                                       |
| QRTMfNSII-1F   | TAGGTTCTCTCGCCGACGAACG                           | Realtime PCR for MfNSII-1                                                                             |
| QRTMfNSII-1R   | ACTCTCCCGTCACCACACCTTCA                          |                                                                                                       |
| QRTMfNSII-2F   | TTTTGTGGGTCCCAAGGGTGAGA                          | Realtime PCR for MfNSII-2                                                                             |
| QRTMfNSII-2R   | GAAGAAACAATCAGTATCCAAG                           |                                                                                                       |
| QRTMfUbi-F     | GAATCATCCGACACAA TCGACAACGTCA                    | Realtime PCR for an internal standard, <i>M. musculus</i> Ubiquitin gene ( <a href="#">TC100151</a> ) |
| QRTMfUbi-R     | AAC AAGGTGAAGCGTGGACTCTTCTGG                     |                                                                                                       |
| MfNSII-RNAiF   | CC <b>cggtac</b> caagctt CAGAA TGGCA TTAG TTGAGC | Construct MfNSII RNAi plasmid transformation vectors                                                  |
| MfNSII-RNAiR   | GG <b>Gctgagctctaga</b> CCTTCTTCTGACCCAAA TGGC   |                                                                                                       |
| MfNSII-1-promF | AA <b>c</b> catggCAAGTGTTAATTT CAGTGTG           | Clone the promoter of MfNSII-1 and construct the plant transformation vectors                         |
| MfNSII-1-promR | AA <b>ctc</b> gag GATA TGTGCTATAGTATA T          |                                                                                                       |
| MfNSII-2-promF | AA <b>ggtac</b> c TCACCGTATTTCGCTCGCAACAC        | Clone the promoter of MfNSII-2 and construct the plant transformation vectors                         |
| MfNSII-2-promR | AA <b>ctc</b> gag AGGTTCCATGGTATGTTGAAGC         |                                                                                                       |

The bold nucleotides constitute *Bam*HI (**ggatc**), *Hind*III (**aagctt**), *Kpn*I (**ggtacc**), *Nco*I (**ccatgg**) or *Xho*I (**ctc**gag) restriction sites.
