# Supplementary material
Source: PubMed Central journal article supplement (PMC1914186)
Supplement: plntphys_pp.106.095018_6.pdf [file plntphys_pp.106.095018_6.pdf]

## SUPPLEMENTAL DATA LEGENDS

**Supplemental Figure 1.** Reversed-phase HPLC profiles of extracts from yeast cells expressing GhFNSII, MtFNSII-1 or MtFNSII-2. Partial HPLC chromatograms show the production of dihydroxylflavone (DHF) from liquiritigenin (Liq) by GhFNSII, MtFNSII-1 and MtFNSII-2. Yeast cells expressing MtFNSII-1 or MtFNSII-2 produced an unknown peak ( $R_t = 11.75$  min) not seen in GhFNSII reactions.

**Supplemental Figure 2.** LC-MS analysis confirms the identity of unknown peak produced from liquiritigenin as 2-hydroxyliquiritigenin. Upon LC-MS analysis, liquiritigenin produce a molecular ion of  $m/z^+ 256$  and product ions  $m/z^+ 137$  and  $m/z^+ 119$  (A) whereas the unknown product produce a molecular ion of  $m/z^+ 273$  and product ions of  $m/z^+ 137$  and  $m/z^+ 121$  (B). Proposed sites of fragmentation indicate on the structure diagrams of liquiritigenin (A) and the unknown product (B) indicate that the unknown product is 2-hydroxyliquiritigenin (See text for details).

**Supplemental Figure 3.** MtFNSII-1 or MtFNSII-2 converts flavanones into 2-hydroxyflavanones and not flavones. *In vitro* assays using microsome preparations from yeast cells expressing MtFNSII-1 show the conversion of naringenin into 2-hydroxyflavanone. The product of apigenin is hardly detectable. Diamonds represent 2-hydroxy-naringenin, Squares represents apigenin.

**Supplemental Figure 4.** Real-time RT-PCR analyses of MtFNSII-1 (CYP93B10) and MtFNSII-2 (CYP93B11) expression in treatment with *S. meliloti*.

**Supplemental Table 1.** PCR primers used in this study.
