# Supplementary material
Source: PubMed Central journal article supplement (PMC1914186)

Vector Control

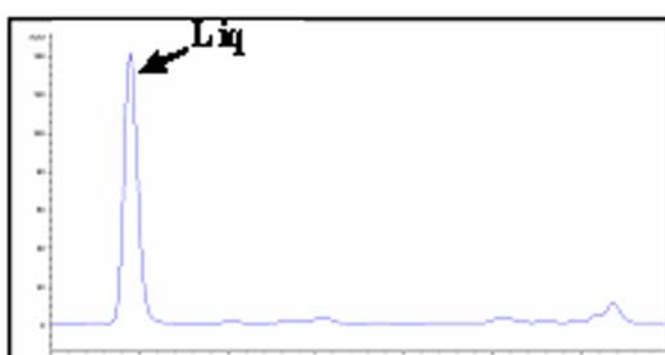

GhFNSII

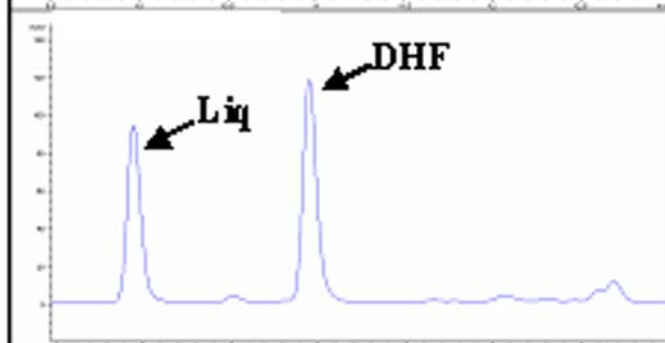

MtFNSII-1

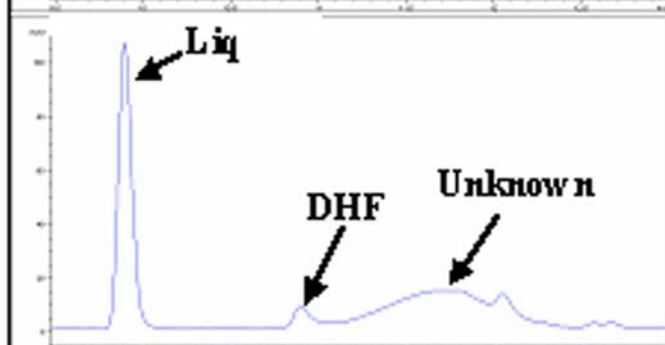

MtFNSII-2

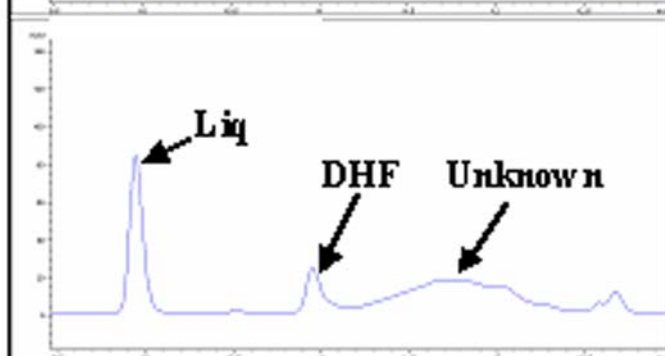

Time (min)

Supplement: plntphys_pp.106.095018_1.pdf [file plntphys_pp.106.095018_1.pdf]

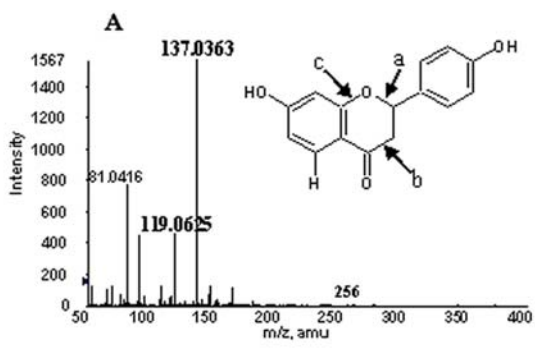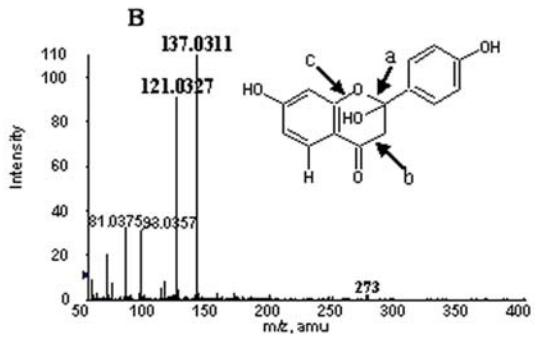

Supplement: plntphys_pp.106.095018_2.pdf [file plntphys_pp.106.095018_2.pdf]

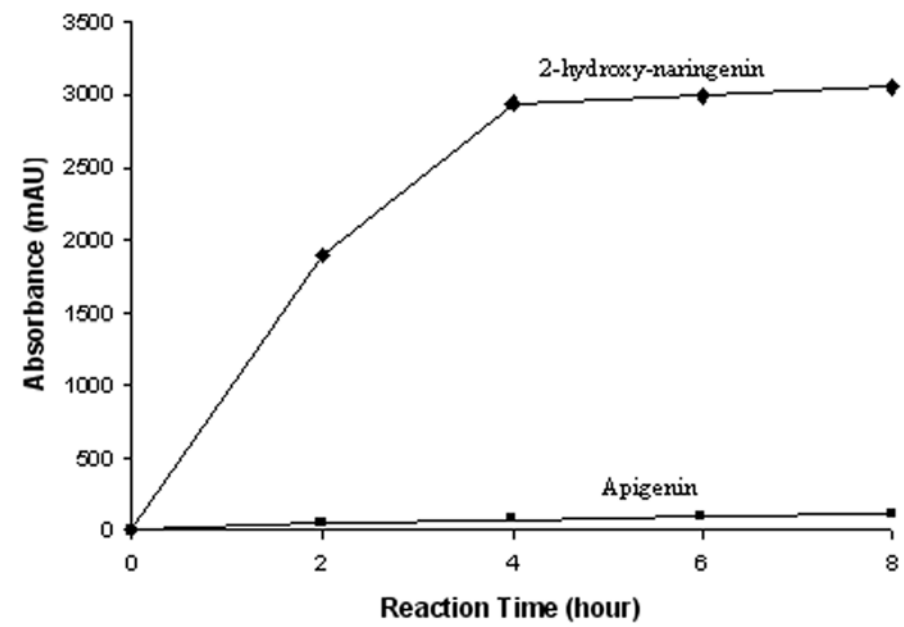

Supplement: plntphys_pp.106.095018_3.pdf [file plntphys_pp.106.095018_3.pdf]

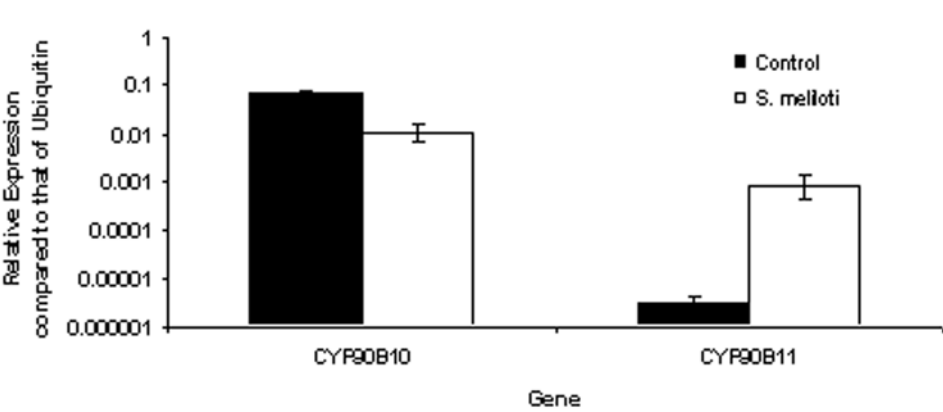

Supplement: plntphys_pp.106.095018_4.pdf [file plntphys_pp.106.095018_4.pdf]
